# Supplementary material for: Timing-dependent effects of salicylic acid treatment on phytohormonal changes, ROS regulation, and antioxidant defense in salinized barley (Hordeum vulgare L.)
Source: PubMed Central journal article supplement (PMC7431421; doi:10.1038/s41598-020-70807-3), 2020-08-17
Supplement: 41598_2020_70807_MOESM1_ESM.pdf [file 41598_2020_70807_MOESM1_ESM.pdf]

# **Timing-Dependent Effects of Salicylic Acid Treatment on Phytohormonal Changes, ROS Regulation, and Antioxidant Defense in Salinized Barley (*Hordeum vulgare* L.)**

Hülya Torun<sup>1,2\*</sup>, Ondřej Novák<sup>3</sup>, Jaromír Mikulík<sup>3</sup>, Aleš Pěňčík<sup>3</sup>, Miroslav Strnad<sup>3</sup>, Faik Ahmet Ayaz<sup>2</sup>

<sup>1</sup>Faculty of Agriculture and Natural Science, Düzce University, Düzce, Turkey

<sup>2</sup>Faculty of Science, Karadeniz Technical University, Trabzon, Turkey

<sup>3</sup>Laboratory of Growth Regulators, Faculty of Science, Palacký University and Institute of Experimental Botany, The Czech Academy of Sciences, Šlechtitelů 27, CZ-78371 Olomouc, Czech Republic

\*Correspondence

Hülya Torun

[hulyatorun@duzce.edu.tr](mailto:hulyatorun@duzce.edu.tr)

**Supplementary Table S1**

Effects of pre- and co-treatment with salicylic acid (SA) on growth parameters (shoot length (L; cm), shoot fresh weight (FW; g) and dry weight (DW; g)) of *Hordeum vulgare* L. cultivars grown under control (C) and saline (150 and 300 mM NaCl) conditions. Values are means  $\pm$  SE ( $n = 7$ ). Asterisks denote significant differences from controls ( $P < 0.05$ ).

|                | C               | 150              | 300              | pSAC             | pSA150           | pSA300           | cSAC             | cSA150           | cSA300           |
|----------------|-----------------|------------------|------------------|------------------|------------------|------------------|------------------|------------------|------------------|
| <b>Akhisar</b> |                 |                  |                  |                  |                  |                  |                  |                  |                  |
| <b>L</b>       | 48.0 $\pm$ 0.5  | 35.7 $\pm$ 5.1*  | 35.5 $\pm$ 1.6*  | 47.0 $\pm$ 4.7   | 38.8 $\pm$ 3.3*  | 40.8 $\pm$ 4.4*  | 47.7 $\pm$ 1.1   | 41.7 $\pm$ 2.3*  | 41.3 $\pm$ 1.2*  |
| <b>FW</b>      | 2.33 $\pm$ 0.22 | 1.17 $\pm$ 0.41* | 0.93 $\pm$ 0.24* | 1.73 $\pm$ 0.50* | 1.48 $\pm$ 0.23* | 1.32 $\pm$ 0.25* | 1.93 $\pm$ 0.18  | 1.40 $\pm$ 0.25* | 1.40 $\pm$ 0.01* |
| <b>DW</b>      | 0.27 $\pm$ 0.06 | 0.15 $\pm$ 0.05* | 0.14 $\pm$ 0.04* | 0.17 $\pm$ 0.04* | 0.23 $\pm$ 0.01  | 0.19 $\pm$ 0.04* | 0.20 $\pm$ 0.05  | 0.31 $\pm$ 0.10  | 0.33 $\pm$ 0.03  |
| <b>Erginel</b> |                 |                  |                  |                  |                  |                  |                  |                  |                  |
| <b>L</b>       | 43.8 $\pm$ 1.52 | 37.9 $\pm$ 1.01* | 34.9 $\pm$ 3.96* | 45.3 $\pm$ 1.88  | 41.4 $\pm$ 1.91  | 37.8 $\pm$ 4.68* | 47.6 $\pm$ 1.56* | 40.3 $\pm$ 3.25  | 32.3 $\pm$ 0.07* |
| <b>FW</b>      | 3.00 $\pm$ 0.11 | 1.26 $\pm$ 0.16* | 1.41 $\pm$ 0.17* | 3.67 $\pm$ 0.34* | 2.13 $\pm$ 0.08* | 1.77 $\pm$ 0.63* | 2.90 $\pm$ 0.83  | 2.15 $\pm$ 0.52  | 1.80 $\pm$ 0.26  |
| <b>DW</b>      | 0.36 $\pm$ 0.01 | 0.17 $\pm$ 0.02* | 0.17 $\pm$ 0.05* | 0.45 $\pm$ 0.05* | 0.29 $\pm$ 0.01* | 0.34 $\pm$ 0.13  | 0.52 $\pm$ 0.21* | 0.36 $\pm$ 0.12  | 0.44 $\pm$ 0.02  |
| <b>Kalaycı</b> |                 |                  |                  |                  |                  |                  |                  |                  |                  |
| <b>L</b>       | 44.8 $\pm$ 1.84 | 38.5 $\pm$ 1.15* | 43.0 $\pm$ 0.65  | 44.2 $\pm$ 0.74  | 44.8 $\pm$ 3.75  | 41.6 $\pm$ 4.10* | 45.3 $\pm$ 1.25  | 45.5 $\pm$ 0.21  | 42.7 $\pm$ 1.62* |
| <b>FW</b>      | 3.33 $\pm$ 0.22 | 2.13 $\pm$ 0.59* | 1.93 $\pm$ 0.16* | 2.15 $\pm$ 0.74* | 2.18 $\pm$ 0.41* | 2.09 $\pm$ 0.22* | 2.64 $\pm$ 0.74* | 2.06 $\pm$ 0.09* | 2.14 $\pm$ 0.27* |
| <b>DW</b>      | 0.52 $\pm$ 0.04 | 0.39 $\pm$ 0.14* | 0.31 $\pm$ 0.04* | 0.19 $\pm$ 0.02* | 0.40 $\pm$ 0.13* | 0.29 $\pm$ 0.06* | 0.29 $\pm$ 0.08* | 0.25 $\pm$ 0.03* | 0.42 $\pm$ 0.07* |

## Supplementary Table S2

Effect of pre- and co-treatment with salicylic acid (SA) on endogenous cytokinin (CK) levels of *Hordeum vulgare* L. cultivars under control (C) and saline (150 mM and 300 mM NaCl) conditions. Values are means  $\pm$  SE ( $n = 7$ ). Asterisks denote significant differences from controls ( $P < 0.05$ ).

| Cytokinin type                | Endogenous cytokinin content (pmol g <sup>-1</sup> FW) |                   |                   |                   |                   |                  |                   |                   |                   |
|-------------------------------|--------------------------------------------------------|-------------------|-------------------|-------------------|-------------------|------------------|-------------------|-------------------|-------------------|
|                               | C                                                      | 150               | 300               | pSAC              | pSA150            | pSA300           | cSAC              | cSA150            | cSA300            |
| <b>Akhisar</b>                |                                                        |                   |                   |                   |                   |                  |                   |                   |                   |
| Total CK Bases                | 3.57 $\pm$ 0.22                                        | 3.02 $\pm$ 0.25*  | 2.34 $\pm$ 0.81*  | 4.09 $\pm$ 0.53   | 2.41 $\pm$ 0.15   | 1.93 $\pm$ 0.41  | 3.50 $\pm$ 0.56   | 1.96 $\pm$ 0.02   | 1.65 $\pm$ 0.41   |
| Total CK Ribosides            | 3.28 $\pm$ 0.41                                        | 5.40 $\pm$ 0.16*  | 7.97 $\pm$ 2.05*  | 6.89 $\pm$ 1.81*  | 3.52 $\pm$ 0.07   | 5.03 $\pm$ 0.63  | 8.60 $\pm$ 1.81*  | 3.01 $\pm$ 0.37   | 3.42 $\pm$ 0.64   |
| Total CK Nucleotides          | 2.55 $\pm$ 0.54                                        | 0.65 $\pm$ 0.00*  | 1.75 $\pm$ 0.20*  | 2.03 $\pm$ 0.26*  | 0.99 $\pm$ 0.01   | 1.43 $\pm$ 0.10  | 1.02 $\pm$ 0.07*  | 1.03 $\pm$ 0.05   | 2.27 $\pm$ 0.34   |
| Total CK <i>O</i> -glucosides | 50.68 $\pm$ 1.82                                       | 45.18 $\pm$ 3.90  | 39.77 $\pm$ 1.27* | 38.32 $\pm$ 0.80* | 42.19 $\pm$ 1.90  | 57.57 $\pm$ 6.87 | 49.55 $\pm$ 3.73  | 49.44 $\pm$ 1.69  | 61.25 $\pm$ 4.70  |
| Total CK 9-glucosides         | 6.75 $\pm$ 0.14                                        | 3.05 $\pm$ 0.21*  | 2.54 $\pm$ 0.07*  | 5.12 $\pm$ 0.15*  | 3.64 $\pm$ 0.11   | 2.98 $\pm$ 0.09  | 2.26 $\pm$ 0.08   | 3.66 $\pm$ 0.08   | 2.93 $\pm$ 0.18   |
| Total CK                      | 66.83 $\pm$ 1.77                                       | 57.29 $\pm$ 4.02* | 54.37 $\pm$ 4.40* | 56.44 $\pm$ 1.95* | 52.75 $\pm$ 1.72* | 68.94 $\pm$ 5.85 | 64.93 $\pm$ 1.38  | 59.10 $\pm$ 1.95* | 71.52 $\pm$ 4.30  |
| <b>Erginel</b>                |                                                        |                   |                   |                   |                   |                  |                   |                   |                   |
| Total CK Bases                | 8.99 $\pm$ 1.87                                        | 22.14 $\pm$ 0.16* | 9.15 $\pm$ 0.47   | 7.51 $\pm$ 0.15*  | 7.63 $\pm$ 0.47   | 12.71 $\pm$ 0.70 | 7.86 $\pm$ 0.36   | 17.02 $\pm$ 1.23  | 12.04 $\pm$ 0.21  |
| Total CK Ribosides            | 31.68 $\pm$ 6.46                                       | 68.75 $\pm$ 2.53* | 33.12 $\pm$ 3.16  | 36.76 $\pm$ 2.48  | 31.27 $\pm$ 1.09  | 57.26 $\pm$ 0.88 | 35.55 $\pm$ 1.72  | 95.49 $\pm$ 5.85  | 50.35 $\pm$ 3.09  |
| Total CK Nucleotides          | 2.96 $\pm$ 0.06                                        | 1.34 $\pm$ 0.02*  | 2.34 $\pm$ 0.16*  | 2.06 $\pm$ 0.56*  | 1.37 $\pm$ 0.08   | 2.13 $\pm$ 0.41  | 2.08 $\pm$ 0.14   | 3.19 $\pm$ 0.21   | 1.85 $\pm$ 0.45   |
| Total CK <i>O</i> -glucosides | 65.49 $\pm$ 2.16                                       | 39.04 $\pm$ 0.86* | 53.04 $\pm$ 1.33* | 51.19 $\pm$ 1.53* | 44.96 $\pm$ 0.04  | 56.19 $\pm$ 4.43 | 44.39 $\pm$ 1.51  | 55.49 $\pm$ 1.40  | 61.31 $\pm$ 1.38  |
| Total CK 9-glucosides         | 6.90 $\pm$ 0.10                                        | 6.95 $\pm$ 0.14   | 3.41 $\pm$ 0.07*  | 4.57 $\pm$ 0.06*  | 5.44 $\pm$ 0.09   | 6.04 $\pm$ 0.12  | 7.16 $\pm$ 0.42   | 4.81 $\pm$ 0.04   | 4.89 $\pm$ 0.32   |
| Total CK                      | 116.0 $\pm$ 6.1                                        | 138.2 $\pm$ 1.7*  | 101.1 $\pm$ 5.1*  | 102.1 $\pm$ 3.7*  | 90.7 $\pm$ 1.5*   | 134.3 $\pm$ 4.5* | 97.0 $\pm$ 0.3*   | 176.0 $\pm$ 8.7*  | 130.4 $\pm$ 4.6*  |
| <b>Kalaycı</b>                |                                                        |                   |                   |                   |                   |                  |                   |                   |                   |
| Total CK Bases                | 2.36 $\pm$ 0.00                                        | 5.21 $\pm$ 1.64*  | 2.85 $\pm$ 0.02*  | 2.81 $\pm$ 0.00*  | 5.77 $\pm$ 0.83   | 9.80 $\pm$ 2.07  | 5.99 $\pm$ 0.26   | 4.12 $\pm$ 0.62   | 4.42 $\pm$ 0.38   |
| Total CK Ribosides            | 1.74 $\pm$ 0.24                                        | 13.58 $\pm$ 4.28* | 14.06 $\pm$ 1.62* | 9.40 $\pm$ 1.30*  | 21.45 $\pm$ 4.11  | 28.04 $\pm$ 7.87 | 16.66 $\pm$ 1.21  | 7.56 $\pm$ 1.10   | 10.48 $\pm$ 1.76  |
| Total CK Nucleotides          | 0.70 $\pm$ 0.05                                        | 2.13 $\pm$ 0.18*  | 3.58 $\pm$ 0.58*  | 2.66 $\pm$ 0.20*  | 2.51 $\pm$ 0.15   | 7.64 $\pm$ 0.40  | 2.61 $\pm$ 0.44   | 0.95 $\pm$ 0.06   | 1.63 $\pm$ 0.31   |
| Total CK <i>O</i> -glucosides | 44.99 $\pm$ 1.93                                       | 46.72 $\pm$ 1.54  | 64.37 $\pm$ 4.58* | 59.08 $\pm$ 5.18* | 45.69 $\pm$ 0.26  | 75.62 $\pm$ 0.17 | 57.43 $\pm$ 4.03  | 48.12 $\pm$ 0.95  | 65.23 $\pm$ 0.09  |
| Total CK 9-glucosides         | 6.80 $\pm$ 0.06                                        | 9.16 $\pm$ 0.11*  | 7.51 $\pm$ 0.17*  | 4.99 $\pm$ 0.03*  | 6.17 $\pm$ 0.17   | 6.45 $\pm$ 0.16  | 4.48 $\pm$ 0.04   | 5.52 $\pm$ 0.15   | 4.47 $\pm$ 0.02   |
| Total CK                      | 56.60 $\pm$ 2.29                                       | 76.79 $\pm$ 4.67* | 92.38 $\pm$ 6.97* | 78.94 $\pm$ 6.72* | 81.59 $\pm$ 4.99* | 127.5 $\pm$ 9.5* | 87.18 $\pm$ 5.98* | 66.27 $\pm$ 0.67* | 86.24 $\pm$ 2.52* |

### Supplementary Table S3

Effects of pre- and co-treatment with salicylic acid (SA) on endogenous cytokinin levels of *Hordeum vulgare* L. ‘Akhisar’ leaves grown under control (C) and saline (150 and 300 mM NaCl) conditions. Values are means  $\pm$  SE ( $n = 7$ ).

| Cytokinin type         | Endogenous cytokinin content (pmol g <sup>-1</sup> FW) |                                    |                                    |                                    |                                    |                                    |                                    |                                    |                                    |
|------------------------|--------------------------------------------------------|------------------------------------|------------------------------------|------------------------------------|------------------------------------|------------------------------------|------------------------------------|------------------------------------|------------------------------------|
|                        | C                                                      | 150                                | 300                                | pSAC                               | pSA150                             | pSA300                             | cSAC                               | cSA150                             | cSA300                             |
| <i>tZ</i>              | 2.61 $\pm$ 0.04                                        | 1.28 $\pm$ 0.25                    | 0.81 $\pm$ 0.00                    | 1.80 $\pm$ 0.09                    | 1.32 $\pm$ 0.01                    | 0.71 $\pm$ 0.00                    | 0.87 $\pm$ 0.18                    | 1.12 $\pm$ 0.11                    | 0.82 $\pm$ 0.00                    |
| <i>tZR</i>             | 0.44 $\pm$ 0.00                                        | 0.14 $\pm$ 0.01                    | 0.11 $\pm$ 0.02                    | 0.39 $\pm$ 0.05                    | 0.22 $\pm$ 0.02                    | 0.09 $\pm$ 0.00                    | 0.06 $\pm$ 0.01                    | 0.21 $\pm$ 0.02                    | 0.05 $\pm$ 0.00                    |
| <i>tZ9G</i>            | 6.37 $\pm$ 0.11                                        | 2.51 $\pm$ 0.04                    | 2.10 $\pm$ 0.00                    | 4.54 $\pm$ 0.09                    | 2.98 $\pm$ 0.08                    | 2.37 $\pm$ 0.08                    | 1.87 $\pm$ 0.05                    | 3.08 $\pm$ 0.16                    | 2.47 $\pm$ 0.21                    |
| <i>tZOG</i>            | 0.99 $\pm$ 0.04                                        | 0.30 $\pm$ 0.08                    | 0.18 $\pm$ 0.04                    | 0.34 $\pm$ 0.01                    | 0.18 $\pm$ 0.00                    | 0.20 $\pm$ 0.05                    | 0.15 $\pm$ 0.01                    | 0.34 $\pm$ 0.02                    | 0.18 $\pm$ 0.02                    |
| <i>tZROG</i>           | 0.53 $\pm$ 0.01                                        | 0.11 $\pm$ 0.04                    | <LOD                               | 0.98 $\pm$ 0.20                    | 0.29 $\pm$ 0.09                    | 0.28 $\pm$ 0.05                    | <LOD                               | 0.40 $\pm$ 0.02                    | 0.39 $\pm$ 0.05                    |
| <i>tZR'5MP</i>         | 0.43 $\pm$ 0.08                                        | 0.11 $\pm$ 0.00                    | 0.16 $\pm$ 0.03                    | 0.69 $\pm$ 0.12                    | 0.24 $\pm$ 0.01                    | <LOD                               | 0.21 $\pm$ 0.00                    | 0.45 $\pm$ 0.01                    | 0.23 $\pm$ 0.01                    |
| <b>Total <i>tZ</i></b> | <b>11.37 <math>\pm</math> 0.05</b>                     | <b>4.40 <math>\pm</math> 0.24</b>  | <b>2.95 <math>\pm</math> 0.31</b>  | <b>8.74 <math>\pm</math> 0.37</b>  | <b>5.23 <math>\pm</math> 0.02</b>  | <b>3.29 <math>\pm</math> 0.43</b>  | <b>3.06 <math>\pm</math> 0.02</b>  | <b>5.60 <math>\pm</math> 0.24</b>  | <b>3.73 <math>\pm</math> 0.68</b>  |
| <i>cZ</i>              | 0.76 $\pm$ 0.17                                        | 1.52 $\pm$ 0.03                    | 1.81 $\pm$ 0.38                    | 1.96 $\pm$ 0.61                    | 0.91 $\pm$ 0.15                    | 1.42 $\pm$ 0.08                    | 2.47 $\pm$ 0.34                    | 0.63 $\pm$ 0.12                    | 1.07 $\pm$ 0.01                    |
| <i>cZR</i>             | 1.11 $\pm$ 0.23                                        | 3.37 $\pm$ 0.14                    | 5.52 $\pm$ 1.47                    | 4.22 $\pm$ 1.46                    | 1.51 $\pm$ 0.03                    | 3.11 $\pm$ 0.04                    | 5.81 $\pm$ 1.48                    | 1.72 $\pm$ 0.44                    | 2.59 $\pm$ 0.43                    |
| <i>cZ9G</i>            | 0.08 $\pm$ 0.00                                        | 0.05 $\pm$ 0.00                    | 0.05 $\pm$ 0.00                    | 0.08 $\pm$ 0.01                    | 0.06 $\pm$ 0.00                    | 0.07 $\pm$ 0.01                    | 0.04 $\pm$ 0.00                    | 0.06 $\pm$ 0.01                    | 0.06 $\pm$ 0.00                    |
| <i>cZOG</i>            | 46.36 $\pm$ 1.49                                       | 39.51 $\pm$ 3.67                   | 31.82 $\pm$ 0.89                   | 33.64 $\pm$ 0.89                   | 38.15 $\pm$ 1.56                   | 48.42 $\pm$ 6.32                   | 45.27 $\pm$ 3.91                   | 44.74 $\pm$ 1.69                   | 49.20 $\pm$ 3.93                   |
| <i>cZROG</i>           | 2.80 $\pm$ 0.28                                        | 5.25 $\pm$ 0.20                    | 7.77 $\pm$ 0.42                    | 3.36 $\pm$ 0.11                    | 3.57 $\pm$ 0.24                    | 8.67 $\pm$ 0.56                    | 4.12 $\pm$ 0.19                    | 3.96 $\pm$ 0.00                    | 11.48 $\pm$ 0.71                   |
| <i>cZR'5MP</i>         | 1.96 $\pm$ 0.65                                        | 0.51 $\pm$ 0.04                    | 1.48 $\pm$ 0.19                    | 1.14 $\pm$ 0.15                    | 0.65 $\pm$ 0.03                    | 1.32 $\pm$ 0.10                    | 0.89 $\pm$ 0.16                    | 0.47 $\pm$ 0.05                    | 1.89 $\pm$ 0.32                    |
| <b>Total <i>cZ</i></b> | <b>53.07 <math>\pm</math> 1.53</b>                     | <b>50.22 <math>\pm</math> 3.73</b> | <b>48.44 <math>\pm</math> 3.34</b> | <b>44.39 <math>\pm</math> 1.22</b> | <b>44.85 <math>\pm</math> 1.70</b> | <b>63.02 <math>\pm</math> 6.85</b> | <b>58.60 <math>\pm</math> 1.74</b> | <b>51.59 <math>\pm</math> 2.21</b> | <b>66.28 <math>\pm</math> 3.88</b> |
| <i>iP</i>              | 0.20 $\pm$ 0.01                                        | 0.22 $\pm$ 0.04                    | 0.13 $\pm$ 0.03                    | 0.34 $\pm$ 0.02                    | 0.18 $\pm$ 0.01                    | 0.16 $\pm$ 0.02                    | 0.16 $\pm$ 0.04                    | 0.20 $\pm$ 0.01                    | 0.17 $\pm$ 0.00                    |
| <i>iPR</i>             | 1.74 $\pm$ 0.18                                        | 1.89 $\pm$ 0.31                    | 2.34 $\pm$ 0.60                    | 2.28 $\pm$ 0.30                    | 1.78 $\pm$ 0.07                    | 1.83 $\pm$ 0.59                    | 2.73 $\pm$ 0.32                    | 1.08 $\pm$ 0.09                    | 0.78 $\pm$ 0.21                    |
| <i>iP9G</i>            | 0.29 $\pm$ 0.03                                        | 0.49 $\pm$ 0.16                    | 0.39 $\pm$ 0.08                    | 0.50 $\pm$ 0.05                    | 0.61 $\pm$ 0.03                    | 0.54 $\pm$ 0.00                    | 0.35 $\pm$ 0.03                    | 0.52 $\pm$ 0.07                    | 0.40 $\pm$ 0.03                    |
| <i>iPR'5MP</i>         | 0.16 $\pm$ 0.02                                        | 0.08 $\pm$ 0.02                    | 0.12 $\pm$ 0.04                    | 0.20 $\pm$ 0.02                    | 0.11 $\pm$ 0.03                    | 0.11 $\pm$ 0.00                    | 0.03 $\pm$ 0.01                    | 0.10 $\pm$ 0.02                    | 0.15 $\pm$ 0.03                    |
| <b>Total <i>iP</i></b> | <b>2.39 <math>\pm</math> 0.19</b>                      | <b>2.67 <math>\pm</math> 0.53</b>  | <b>2.98 <math>\pm</math> 0.74</b>  | <b>3.31 <math>\pm</math> 0.35</b>  | <b>2.68 <math>\pm</math> 0.00</b>  | <b>2.63 <math>\pm</math> 0.57</b>  | <b>3.27 <math>\pm</math> 0.34</b>  | <b>1.91 <math>\pm</math> 0.02</b>  | <b>1.50 <math>\pm</math> 0.26</b>  |

Below the limit of detection (< LOD), *trans*-Zeatin (*tZ*), *trans*-Zeatin riboside (*tZR*), *trans*-Zeatin-9-glucoside (*tZ9G*), *trans*-Zeatin-*O*-glucoside (*tZOG*), *trans*-zeatin-*O*-glucoside riboside (*tZROG*), *trans*-Zeatin-9-riboside-5'-monophosphate (*tZR5'MP*), *cis*-Zeatin (*cZ*), *cis*-zeatin riboside (*cZR*), *cis*-Zeatin-9-glucoside (*cZ9G*), *cis*-Zeatin-*O*-glucoside (*cZOG*), *cis*-Zeatin-*O*-glucoside riboside (*cZROG*), *cis*-Zeatin-9-riboside-5'-monophosphate (*cZR5'MP*), *N*<sup>6</sup>-isopentenyladenine (*iP*), *N*<sup>6</sup>-isopentenyladenosine (*iPR*), *N*<sup>6</sup>-isopentenyladenine-9-glucose (*iP9G*) and *N*<sup>6</sup>-isopentenyladenosine-5'-monophosphate (*iPR5'MP*).

### Supplementary Table S4

Effects of pre- and co-treatment with salicylic acid (SA) on endogenous cytokinin levels of *Hordeum vulgare* L. ‘Erginel’ leaves grown under control (C) and saline (150 and 300 mM NaCl) conditions. Values are means  $\pm$  SE ( $n = 7$ ).

| Cytokinin type         | Endogenous cytokinin content (pmol g <sup>-1</sup> FW) |                                     |                                    |                                    |                                    |                                     |                                    |                                     |                                     |
|------------------------|--------------------------------------------------------|-------------------------------------|------------------------------------|------------------------------------|------------------------------------|-------------------------------------|------------------------------------|-------------------------------------|-------------------------------------|
|                        | C                                                      | 150                                 | 300                                | pSAC                               | pSA150                             | pSA300                              | cSAC                               | cSA150                              | cSA300                              |
| <i>tZ</i>              | 0.80 $\pm$ 0.01                                        | 1.53 $\pm$ 0.17                     | 0.87 $\pm$ 0.01                    | 0.65 $\pm$ 0.05                    | 0.77 $\pm$ 0.01                    | 0.95 $\pm$ 0.00                     | 0.10 $\pm$ 0.08                    | 1.46 $\pm$ 0.25                     | <LOD                                |
| <i>tZR</i>             | 0.20 $\pm$ 0.02                                        | 0.29 $\pm$ 0.00                     | 0.22 $\pm$ 0.00                    | 0.11 $\pm$ 0.00                    | 0.15 $\pm$ 0.02                    | 0.17 $\pm$ 0.02                     | 0.16 $\pm$ 0.03                    | 0.21 $\pm$ 0.00                     | 0.24 $\pm$ 0.02                     |
| <i>tZ9G</i>            | 6.60 $\pm$ 0.11                                        | 6.69 $\pm$ 0.10                     | 3.10 $\pm$ 0.11                    | 4.28 $\pm$ 0.02                    | 5.05 $\pm$ 0.17                    | 5.85 $\pm$ 0.16                     | 6.64 $\pm$ 0.35                    | 4.07 $\pm$ 0.11                     | 4.52 $\pm$ 0.35                     |
| <i>tZOG</i>            | 0.92 $\pm$ 0.15                                        | 0.41 $\pm$ 0.04                     | 0.23 $\pm$ 0.00                    | 0.35 $\pm$ 0.00                    | 0.50 $\pm$ 0.02                    | 0.41 $\pm$ 0.12                     | 0.64 $\pm$ 0.06                    | 0.43 $\pm$ 0.01                     | 0.38 $\pm$ 0.05                     |
| <i>tZROG</i>           | 1.05 $\pm$ 0.05                                        | 0.80 $\pm$ 0.10                     | <LOD                               | <LOD                               | 0.37 $\pm$ 0.07                    | 0.32 $\pm$ 0.01                     | 0.31 $\pm$ 0.04                    | 0.95 $\pm$ 0.27                     | 0.40 $\pm$ 0.01                     |
| <i>tZR'5MP</i>         | 0.38 $\pm$ 0.03                                        | <LOD                                | 0.15 $\pm$ 0.00                    | 0.14 $\pm$ 0.00                    | 0.19 $\pm$ 0.04                    | 0.21 $\pm$ 0.07                     | 0.18 $\pm$ 0.00                    | 0.53 $\pm$ 0.08                     | 0.32 $\pm$ 0.06                     |
| <b>Total <i>tZ</i></b> | <b>9.95 <math>\pm</math> 0.14</b>                      | <b>9.72 <math>\pm</math> 0.40</b>   | <b>4.50 <math>\pm</math> 0.02</b>  | <b>5.45 <math>\pm</math> 0.10</b>  | <b>7.05 <math>\pm</math> 0.10</b>  | <b>7.43 <math>\pm</math> 0.50</b>   | <b>8.93 <math>\pm</math> 0.22</b>  | <b>7.66 <math>\pm</math> 0.33</b>   | <b>5.86 <math>\pm</math> 0.35</b>   |
| <i>cZ</i>              | 7.85 $\pm$ 1.79                                        | 20.19 $\pm$ 0.31                    | 8.07 $\pm$ 0.45                    | 6.60 $\pm$ 0.19                    | 6.57 $\pm$ 0.44                    | 11.93 $\pm$ 0.25                    | 6.52 $\pm$ 0.41                    | 14.83 $\pm$ 0.95                    | 11.72 $\pm$ 0.21                    |
| <i>cZR</i>             | 23.42 $\pm$ 4.65                                       | 46.19 $\pm$ 2.04                    | 25.49 $\pm$ 2.02                   | 24.15 $\pm$ 0.72                   | 23.60 $\pm$ 0.62                   | 39.20 $\pm$ 0.40                    | 25.55 $\pm$ 1.15                   | 55.02 $\pm$ 0.97                    | 33.82 $\pm$ 2.13                    |
| <i>cZ9G</i>            | 0.06 $\pm$ 0.00                                        | 0.04 $\pm$ 0.00                     | 0.03 $\pm$ 0.01                    | 0.04 $\pm$ 0.01                    | 0.05 $\pm$ 0.01                    | 0.06 $\pm$ 0.01                     | 0.04 $\pm$ 0.00                    | 0.07 $\pm$ 0.01                     | 0.07 $\pm$ 0.00                     |
| <i>cZOG</i>            | 56.09 $\pm$ 1.70                                       | 30.86 $\pm$ 0.86                    | 43.90 $\pm$ 0.89                   | 42.86 $\pm$ 1.29                   | 37.16 $\pm$ 0.09                   | 45.74 $\pm$ 4.24                    | 36.86 $\pm$ 1.16                   | 42.22 $\pm$ 1.10                    | 48.49 $\pm$ 1.82                    |
| <i>cZROG</i>           | 7.42 $\pm$ 0.36                                        | 6.97 $\pm$ 0.14                     | 8.92 $\pm$ 0.44                    | 7.98 $\pm$ 0.24                    | 6.92 $\pm$ 0.04                    | 9.73 $\pm$ 0.04                     | 6.58 $\pm$ 0.44                    | 11.89 $\pm$ 0.03                    | 12.05 $\pm$ 0.48                    |
| <i>cZR'5MP</i>         | 2.43 $\pm$ 0.01                                        | 1.18 $\pm$ 0.04                     | 2.05 $\pm$ 0.06                    | 1.88 $\pm$ 0.46                    | 1.06 $\pm$ 0.10                    | 1.86 $\pm$ 0.28                     | 1.92 $\pm$ 0.03                    | 2.47 $\pm$ 0.29                     | 1.35 $\pm$ 0.33                     |
| <b>Total <i>cZ</i></b> | <b>97.28 <math>\pm</math> 4.37</b>                     | <b>105.42 <math>\pm</math> 1.58</b> | <b>88.45 <math>\pm</math> 3.87</b> | <b>83.53 <math>\pm</math> 1.97</b> | <b>75.36 <math>\pm</math> 1.02</b> | <b>108.50 <math>\pm</math> 4.40</b> | <b>77.47 <math>\pm</math> 0.01</b> | <b>126.49 <math>\pm</math> 3.33</b> | <b>107.50 <math>\pm</math> 3.35</b> |
| <i>iP</i>              | 0.33 $\pm$ 0.08                                        | 0.42 $\pm$ 0.01                     | 0.21 $\pm$ 0.01                    | 0.26 $\pm$ 0.01                    | 0.29 $\pm$ 0.02                    | 0.31 $\pm$ 0.02                     | 0.25 $\pm$ 0.03                    | 0.74 $\pm$ 0.03                     | 0.32 $\pm$ 0.01                     |
| <i>iPR</i>             | 8.05 $\pm$ 1.79                                        | 22.27 $\pm$ 0.49                    | 7.41 $\pm$ 1.13                    | 12.49 $\pm$ 1.76                   | 7.53 $\pm$ 0.45                    | 17.90 $\pm$ 0.47                    | 9.84 $\pm$ 0.54                    | 40.25 $\pm$ 4.88                    | 16.28 $\pm$ 0.94                    |
| <i>iP9G</i>            | 0.24 $\pm$ 0.00                                        | 0.23 $\pm$ 0.04                     | 0.27 $\pm$ 0.03                    | 0.25 $\pm$ 0.05                    | 0.34 $\pm$ 0.09                    | 0.13 $\pm$ 0.04                     | 0.48 $\pm$ 0.07                    | 0.68 $\pm$ 0.16                     | 0.30 $\pm$ 0.03                     |
| <i>iPR'5MP</i>         | 0.15 $\pm$ 0.03                                        | 0.16 $\pm$ 0.02                     | 0.22 $\pm$ 0.03                    | 0.11 $\pm$ 0.03                    | 0.12 $\pm$ 0.03                    | 0.13 $\pm$ 0.00                     | 0.08 $\pm$ 0.02                    | 0.19 $\pm$ 0.00                     | 0.18 $\pm$ 0.06                     |
| <b>Total <i>iP</i></b> | <b>8.78 <math>\pm</math> 1.90</b>                      | <b>23.08 <math>\pm</math> 0.49</b>  | <b>8.11 <math>\pm</math> 1.20</b>  | <b>13.12 <math>\pm</math> 1.80</b> | <b>8.27 <math>\pm</math> 0.59</b>  | <b>18.40 <math>\pm</math> 0.37</b>  | <b>10.64 <math>\pm</math> 0.52</b> | <b>41.86 <math>\pm</math> 5.06</b>  | <b>17.08 <math>\pm</math> 0.86</b>  |

Below the limit of detection (< LOD), *trans*-Zeatin (*tZ*), *trans*-Zeatin riboside (*tZR*), *trans*-Zeatin-9-glucoside (*tZ9G*), *trans*-Zeatin-*O*-glucoside (*tZOG*), *trans*-zeatin-*O*-glucoside riboside (*tZROG*), *trans*-Zeatin-9-riboside-5'-monophosphate (*tZR5'MP*), *cis*-Zeatin (*cZ*), *cis*-zeatin riboside (*cZR*), *cis*-Zeatin-9-glucoside (*cZ9G*), *cis*-Zeatin-*O*-glucoside (*cZOG*), *cis*-Zeatin-*O*-glucoside riboside (*cZROG*), *cis*-Zeatin-9-riboside-5'-monophosphate (*cZR5'MP*), *N*<sup>6</sup>-isopentenyladenine (*iP*), *N*<sup>6</sup>-isopentenyladenosine (*iPR*), *N*<sup>6</sup>-isopentenyladenine-9-glucose (*iP9G*) and *N*<sup>6</sup>-isopentenyladenosine-5'-monophosphate (*iPR5'MP*).

### Supplementary Table S5

Effects of pre- and co-treatment with salicylic acid (SA) on endogenous cytokinin levels of *Hordeum vulgare* L. ‘Kalaycı’ leaves grown under control (C) and saline (150 and 300 mM NaCl) conditions. Values are means  $\pm$  SE ( $n = 7$ ).

| Cytokinin type         | Endogenous cytokinin content (pmol g <sup>-1</sup> FW) |                                    |                                    |                                    |                                    |                                     |                                    |                                    |                                    |
|------------------------|--------------------------------------------------------|------------------------------------|------------------------------------|------------------------------------|------------------------------------|-------------------------------------|------------------------------------|------------------------------------|------------------------------------|
|                        | C                                                      | 150                                | 300                                | pSAC                               | pSA150                             | pSA300                              | cSAC                               | cSA150                             | cSA300                             |
| <i>tZ</i>              | 1.76 $\pm$ 0.09                                        | 1.77 $\pm$ 0.54                    | 0.69 $\pm$ 0.00                    | 0.55 $\pm$ 0.02                    | 1.24 $\pm$ 0.16                    | 0.88 $\pm$ 0.12                     | 1.15 $\pm$ 0.17                    | 1.10 $\pm$ 0.00                    | 0.71 $\pm$ 0.00                    |
| <i>tZR</i>             | 0.25 $\pm$ 0.02                                        | 0.61 $\pm$ 0.08                    | 0.22 $\pm$ 0.02                    | 0.12 $\pm$ 0.03                    | 0.32 $\pm$ 0.03                    | 0.29 $\pm$ 0.00                     | 0.32 $\pm$ 0.01                    | 0.26 $\pm$ 0.06                    | 0.15 $\pm$ 0.04                    |
| <i>tZ9G</i>            | 6.36 $\pm$ 0.07                                        | 8.31 $\pm$ 0.12                    | 6.98 $\pm$ 0.04                    | 4.52 $\pm$ 0.03                    | 5.67 $\pm$ 0.02                    | 6.02 $\pm$ 0.04                     | 3.93 $\pm$ 0.11                    | 5.14 $\pm$ 0.04                    | 4.13 $\pm$ 0.02                    |
| <i>tZOG</i>            | 0.66 $\pm$ 0.02                                        | 0.99 $\pm$ 0.01                    | 0.63 $\pm$ 0.04                    | 0.45 $\pm$ 0.09                    | 0.50 $\pm$ 0.02                    | 0.78 $\pm$ 0.06                     | 0.68 $\pm$ 0.00                    | 0.58 $\pm$ 0.04                    | 0.38 $\pm$ 0.03                    |
| <i>tZROG</i>           | 0.26 $\pm$ 0.06                                        | 1.09 $\pm$ 0.15                    | 0.69 $\pm$ 0.06                    | 0.34 $\pm$ 0.08                    | 0.26 $\pm$ 0.00                    | 1.05 $\pm$ 0.26                     | 0.52 $\pm$ 0.04                    | <LOD                               | <LOD                               |
| <i>tZR'5MP</i>         | 0.30 $\pm$ 0.20                                        | 0.73 $\pm$ 0.09                    | 0.38 $\pm$ 0.00                    | 0.20 $\pm$ 0.02                    | <LOD                               | 0.78 $\pm$ 0.10                     | 0.32 $\pm$ 0.00                    | 0.74 $\pm$ 0.03                    | <LOD                               |
| <b>Total <i>tZ</i></b> | <b>9.59 <math>\pm</math> 0.08</b>                      | <b>13.50 <math>\pm</math> 0.78</b> | <b>9.25 <math>\pm</math> 0.20</b>  | <b>6.19 <math>\pm</math> 0.08</b>  | <b>7.99 <math>\pm</math> 0.020</b> | <b>9.80 <math>\pm</math> 0.49</b>   | <b>6.75 <math>\pm</math> 0.05</b>  | <b>7.83 <math>\pm</math> 0.08</b>  | <b>5.01 <math>\pm</math> 0.37</b>  |
| <i>cZ</i>              | 0.46 $\pm$ 0.11                                        | 3.08 $\pm$ 0.99                    | 2.30 $\pm$ 0.34                    | 2.10 $\pm$ 0.02                    | 4.35 $\pm$ 0.66                    | 8.60 $\pm$ 2.17                     | 4.59 $\pm$ 0.42                    | 2.83 $\pm$ 0.62                    | 3.88 $\pm$ 0.70                    |
| <i>cZR</i>             | 0.77 $\pm$ 0.25                                        | 8.40 $\pm$ 3.15                    | 8.01 $\pm$ 2.01                    | 5.71 $\pm$ 0.78                    | 13.96 $\pm$ 2.71                   | 18.56 $\pm$ 4.69                    | 11.24 $\pm$ 1.10                   | 5.31 $\pm$ 0.86                    | 7.70 $\pm$ 1.07                    |
| <i>cZ9G</i>            | 0.04 $\pm$ 0.00                                        | 0.06 $\pm$ 0.00                    | 0.05 $\pm$ 0.00                    | 0.03 $\pm$ 0.01                    | 0.03 $\pm$ 0.00                    | 0.08 $\pm$ 0.01                     | 0.04 $\pm$ 0.01                    | 0.02 $\pm$ 0.00                    | 0.04 $\pm$ 0.00                    |
| <i>cZOG</i>            | 40.38 $\pm$ 2.09                                       | 39.85 $\pm$ 1.93                   | 50.50 $\pm$ 3.13                   | 51.86 $\pm$ 6.17                   | 38.99 $\pm$ 0.71                   | 65.40 $\pm$ 0.05                    | 50.55 $\pm$ 3.90                   | 42.65 $\pm$ 1.43                   | 55.75 $\pm$ 0.64                   |
| <i>cZROG</i>           | 3.70 $\pm$ 0.08                                        | 4.79 $\pm$ 0.27                    | 12.55 $\pm$ 1.35                   | 6.43 $\pm$ 1.01                    | 5.94 $\pm$ 0.46                    | 8.38 $\pm$ 0.10                     | 5.69 $\pm$ 0.17                    | 4.89 $\pm$ 0.44                    | 9.10 $\pm$ 0.52                    |
| <i>cZR'5MP</i>         | 0.30 $\pm$ 0.11                                        | 1.26 $\pm$ 0.28                    | 2.91 $\pm$ 0.60                    | 2.26 $\pm$ 0.22                    | 2.28 $\pm$ 0.10                    | 6.20 $\pm$ 0.44                     | 2.31 $\pm$ 0.28                    | 0.21 $\pm$ 0.03                    | 1.57 $\pm$ 0.37                    |
| <b>Total <i>cZ</i></b> | <b>45.65 <math>\pm</math> 2.26</b>                     | <b>57.45 <math>\pm</math> 2.76</b> | <b>76.31 <math>\pm</math> 7.45</b> | <b>68.38 <math>\pm</math> 6.14</b> | <b>65.55 <math>\pm</math> 3.22</b> | <b>107.21 <math>\pm</math> 6.57</b> | <b>74.42 <math>\pm</math> 5.85</b> | <b>55.92 <math>\pm</math> 0.52</b> | <b>87.03 <math>\pm</math> 2.26</b> |
| <i>iP</i>              | 0.14 $\pm$ 0.02                                        | 0.36 $\pm$ 0.10                    | 0.20 $\pm$ 0.02                    | 0.16 $\pm$ 0.04                    | 0.18 $\pm$ 0.01                    | 0.32 $\pm$ 0.02                     | 0.25 $\pm$ 0.01                    | 0.18 $\pm$ 0.00                    | 0.19 $\pm$ 0.03                    |
| <i>iPR</i>             | 0.72 $\pm$ 0.01                                        | 4.57 $\pm$ 1.05                    | 5.83 $\pm$ 0.40                    | 3.57 $\pm$ 0.56                    | 7.17 $\pm$ 1.37                    | 9.18 $\pm$ 3.17                     | 5.10 $\pm$ 0.12                    | 1.99 $\pm$ 0.18                    | 2.63 $\pm$ 0.66                    |
| <i>iP9G</i>            | 0.40 $\pm$ 0.01                                        | 0.79 $\pm$ 0.01                    | 0.48 $\pm$ 0.13                    | 0.44 $\pm$ 0.07                    | 0.47 $\pm$ 0.15                    | 0.35 $\pm$ 0.12                     | 0.51 $\pm$ 0.06                    | 0.36 $\pm$ 0.10                    | 0.31 $\pm$ 0.01                    |
| <i>iPR'5MP</i>         | 0.10 $\pm$ 0.03                                        | 0.13 $\pm$ 0.01                    | 0.30 $\pm$ 0.03                    | 0.19 $\pm$ 0.01                    | 0.23 $\pm$ 0.04                    | 0.67 $\pm$ 0.13                     | 0.14 $\pm$ 0.01                    | <LOD                               | 0.14 $\pm$ 0.00                    |
| <b>Total <i>iP</i></b> | <b>1.35 <math>\pm</math> 0.06</b>                      | <b>5.85 <math>\pm</math> 1.13</b>  | <b>6.81 <math>\pm</math> 0.28</b>  | <b>4.36 <math>\pm</math> 0.67</b>  | <b>8.05 <math>\pm</math> 1.57</b>  | <b>10.53 <math>\pm</math> 3.45</b>  | <b>6.00 <math>\pm</math> 0.08</b>  | <b>2.53 <math>\pm</math> 0.08</b>  | <b>3.20 <math>\pm</math> 0.63</b>  |

Below the limit of detection (< LOD), *trans*-Zeatin (*tZ*), *trans*-Zeatin riboside (*tZR*), *trans*-Zeatin-9-glucoside (*tZ9G*), *trans*-Zeatin-*O*-glucoside (*tZOG*), *trans*-zeatin-*O*-glucoside riboside (*tZROG*), *trans*-Zeatin-9-riboside-5'-monophosphate (*tZR5'MP*), *cis*-Zeatin (*cZ*), *cis*-zeatin riboside (*cZR*), *cis*-Zeatin-9-glucoside (*cZ9G*), *cis*-Zeatin-*O*-glucoside (*cZOG*), *cis*-Zeatin-*O*-glucoside riboside (*cZROG*), *cis*-Zeatin-9-riboside-5'-monophosphate (*cZR5'MP*), *N*<sup>6</sup>-isopentenyladenine (*iP*), *N*<sup>6</sup>-isopentenyladenosine (*iPR*), *N*<sup>6</sup>-isopentenyladenine-9-glucose (*iP9G*) and *N*<sup>6</sup>-isopentenyladenosine-5'-monophosphate (*iPR5'MP*).
